# Supplementary material for: Highly efficient redox reaction between potassium permanganate and 3,3′,5,5′-tetramethylbenzidine for application in hydrogen peroxide based colorimetric assays
Source: Royal Society of Chemistry journal article supplement (doi:10.1039/c8ra07758d), 2019-01-01
Supplement: c8ra07758d1.pdf [file c8ra07758d1.pdf]

## Electronic Supplementary Information

### Highly efficient redox reaction between potassium permanganate and 3, 3', 5, 5'-tetramethylbenzidine for application in hydrogen peroxide based colorimetric assay

Ying Sun,<sup>abc</sup> Hui Liu,<sup>e</sup> Xionghong Tan,<sup>abc</sup> Zheng Li,<sup>d</sup> Yanlin Du,<sup>abc</sup> Aixian Zheng,<sup>\*bc</sup> Xiaolong Liu<sup>\*bc</sup> and Niancai Peng<sup>\*d</sup>

<sup>a</sup> College of Life Science, Fujian Agriculture and Forestry University, Fuzhou, Fujian 350002, P. R. China.

<sup>b</sup> Fujian Institute of Research on the Structure of Matter, Chinese Academy of Sciences, Fuzhou, Fujian 350002, P. R. China.

<sup>c</sup> The United Innovation of Mengchao Hepatobiliary Technology Key Laboratory of Fujian Province, Mengchao Hepatobiliary Hospital of Fujian Medical University, Fuzhou 350025, P. R. China.

<sup>d</sup> State Key Laboratory for Manufacturing System Engineering, School of Mechanical Engineering, Xi'an Jiaotong University, Xi'an 710049, P. R. China.

<sup>e</sup> Fifth People's Hospital, Ganzhou City, Jiangxi Province.

\*Corresponding authors.

Tel: +86-591-83705927; E-mail addresses:

zax040500273@126.com; xiaoloong.liu@gmail.com; pnc@mail.xjtu.edu.cn.

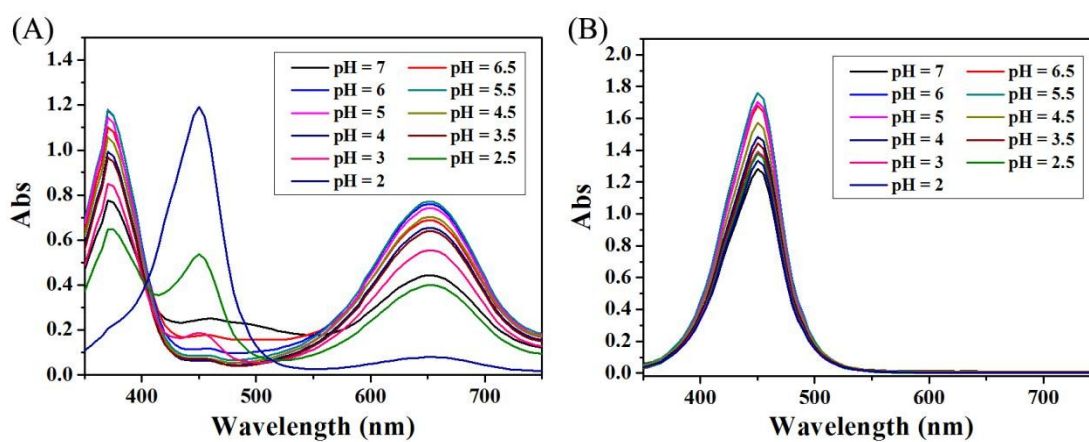

**Fig. S1** (A) The absorption spectra of  $\text{KMnO}_4$ -TMB system performed in 10 mM PBS buffer with different pH values (2, 2.5, 3, 3.5, 4, 4.5, 5, 5.5, 6, 6.5 and 7); (B) the absorption spectra of the corresponding solution after addition of sulfuric acid.

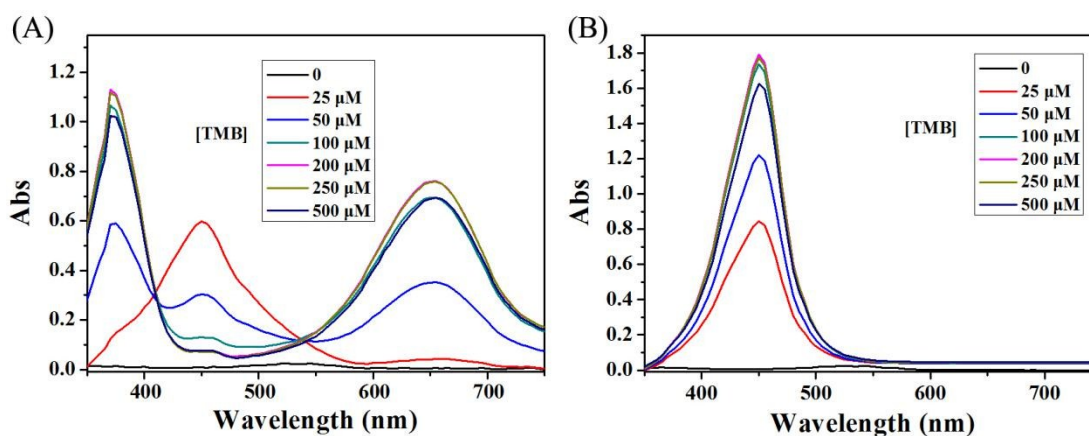

**Fig. S2** (A) The absorption spectra of  $\text{KMnO}_4$  (20  $\mu\text{M}$ ) after reaction with different concentrations of TMB (0, 25, 50, 100, 200, 250 and 500  $\mu\text{M}$ ); (B) the absorption spectra of the corresponding solution after addition of sulfuric acid.

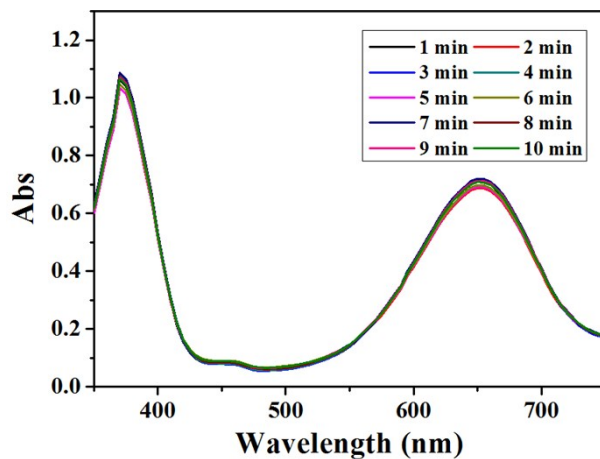

**Fig. S3** The absorption spectra of 20 μM KMnO<sub>4</sub> solution after addition of 200 μM TMB for different times.

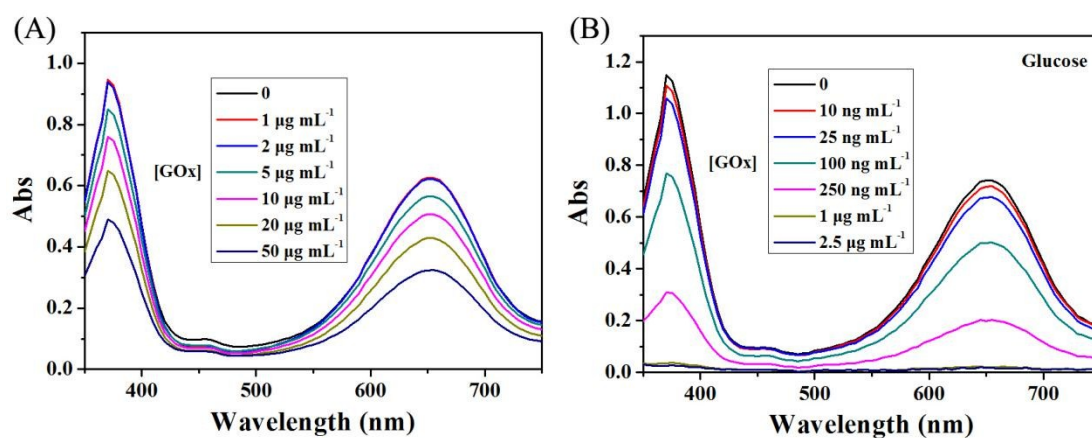

**Fig. S4** (A) The absorption spectra of KMnO<sub>4</sub>-TMB system upon addition of different concentrations of GOx (varied from 1 μg mL<sup>-1</sup> to 50 μg mL<sup>-1</sup>); (B) The absorption spectra of KMnO<sub>4</sub>-TMB system for glucose detection by using different concentrations of GOx (varied from 10 ng mL<sup>-1</sup> to 2.5 μg mL<sup>-1</sup>).

**Table S1** Comparison of the present method with other methods for the detection of glucose.

| Materials                            | Linear range ( $\mu\text{M}$ ) | LOD ( $\mu\text{M}$ ) | Reference |
|--------------------------------------|--------------------------------|-----------------------|-----------|
| $\text{Fe}_3\text{O}_4$ MNPs         | 50-1000                        | 30                    | 1         |
| Graphene Oxide                       | 1-20                           | 1                     | 2         |
| Cu NCs                               | 100-2000                       | 100                   | 3         |
| Gold nanorods                        | 100-1000                       | 100                   | 4         |
| AuNPs                                | 18-1100                        | 4                     | 5         |
| Au@Pt core-shell nanorods            | 45-400                         | 45                    | 6         |
| $\text{MoS}_2$ Nanosheets            | 5-150                          | 1.2                   | 7         |
| $\text{WSe}_2$ Nanosheets            | 10-60                          | 10                    | 8         |
| g- $\text{C}_3\text{N}_4$ nanosheets | -                              | 0.4                   | 9         |
| Dichlorofluorescein                  | 80-1200                        | 30                    | 10        |
| PdNPs/Cu-TCPP(Fe)                    | 2-200                          | 0.994                 | 11        |
| CoOOH nanoflakes                     | 5.3-100                        | 5.3                   | 12        |
| $\text{KMnO}_4$ - TMB                | 10-400                         | 4.55                  | This work |

## References

1. H. Wei, E. Wang, *Anal. Chem.*, 2008, **80**, 2250-2254.
2. Y. Song, K. Qu, C. Zhao, J. Ren, X. Qu, *Adv. Mater.*, 2010, **22**, 2206-2210.
3. L. Hu, Y. Yuan, L. Zhang, J. Zhao, S. Majeed, G. Xu, *Anal. Chim. Acta.*, 2013, **762**, 83-86.
4. X. Liu, S. Zhang, P. Tan, J. Zhou, Y. Huang, Z. Nie, S. Yao, *Chem. Commun.*, 2013, **49**, 1856-1858.
5. Y. Jv, B. Li, R. Cao, *Chem. Commun.*, 2010, **46**, 8017-8019.
6. J. Liu, X. Hu, S. Hou, T. Wen, W. Liu, X. Zhu, J. J. Yin, X. Wu, *Sensors and Actuators B*, 2012, **166**, 708-714.

7. T. Lin, L. Zhong, L. Guo, F. Fu, G. Chen, *Nanoscale*, 2014, **6**, 11856-11862.
8. T. M. Chen, X. J. Wu, J. X. Wang, G. W. Yang, *Nanoscale*, 2017, **9**, 11806-11813.
9. J. W. Liu, Y. Luo, Y. M. Wang, L. Y. Duan, J. H. Jiang, R. Q. Yu, *ACS Appl. Mater. Interfaces*, 2016, **8**, 33439-33445.
10. M. Li, L. Liu, Y. Shi, Y. Yang, H. Zheng, Y. Long, *New J. Chem.*, 2017, **41**, 7578-7582
11. H. Chen, Q. Qiu, S. Sharif, S. Ying, Y. Wang, Y. Ying, *ACS Appl. Mater. Interfaces*, 2018, **10**, 24108-24115.
12. Y. M. Wang, J. W. Liu, J. H. Jiang, W. Zhong, *Anal Bioanal Chem*, 2017, **409**, 225-4232.
